# Supplementary material for: Structural analysis of a trimeric assembly of the mitochondrial dynamin-like GTPase Mgm1
Source: PubMed Central journal article supplement — Proc Natl Acad Sci U S A. 2020 Feb 10;117(8):4061–70. doi: 10.1073/pnas.1919116117 (PMC7049166; doi:10.1073/pnas.1919116117), 2020-02-10
Supplement: pnas.1919116117.sapp.pdf [file pnas.1919116117.sapp.pdf]

## Supplemental Information (SI) Appendix

### Structural analysis of a trimeric assembly of the mitochondrial dynamin-like GTPase Mgm1

Liming Yan<sup>1,2,7</sup>, Yuanbo Qi<sup>1,3,7</sup>, Derek Ricketson<sup>4,7</sup>, Lei Li<sup>2</sup>, Kelly Subramanian<sup>4</sup>,  
Jinghua Zhao<sup>3</sup>, Caiting Yu<sup>2</sup>, Lijie Wu<sup>5</sup>, Reta Sarsam<sup>4</sup>, Melissa Wong<sup>4</sup>, Zhiyong Lou<sup>2</sup>,  
Zihe Rao<sup>1,2,3,\*</sup>, Jodi Nunnari<sup>4,\*</sup>, Junjie Hu<sup>1,6,\*</sup>

<sup>1</sup>National Laboratory of Macromolecules, Institute of Biophysics, Chinese Academy of Science, Beijing, China.

<sup>2</sup>School of Medicine, Tsinghua University, Beijing, China.

<sup>3</sup>College of Life Sciences, Nankai University, and State Key Laboratory of Medicinal Chemical Biology, Tianjin, China.

<sup>4</sup>Department of Molecular and Cellular Biology, University of California, Davis, Davis, CA, USA.

<sup>5</sup>iHuman Institute, ShanghaiTech University, Shanghai, China.

<sup>6</sup>College of Life Sciences, University of CAS, Beijing, China

<sup>7</sup>These authors contributed equally.

\*To whom correspondence should be addressed: raozh@mail.tsinghua.edu.cn (Z.R.), jmnunnari@ucdavis.edu (J.N.), huj@ibp.ac.cn (J.H.)

Includes:

SI figures, Fig S1-S7

SI tables, Table S1-S2

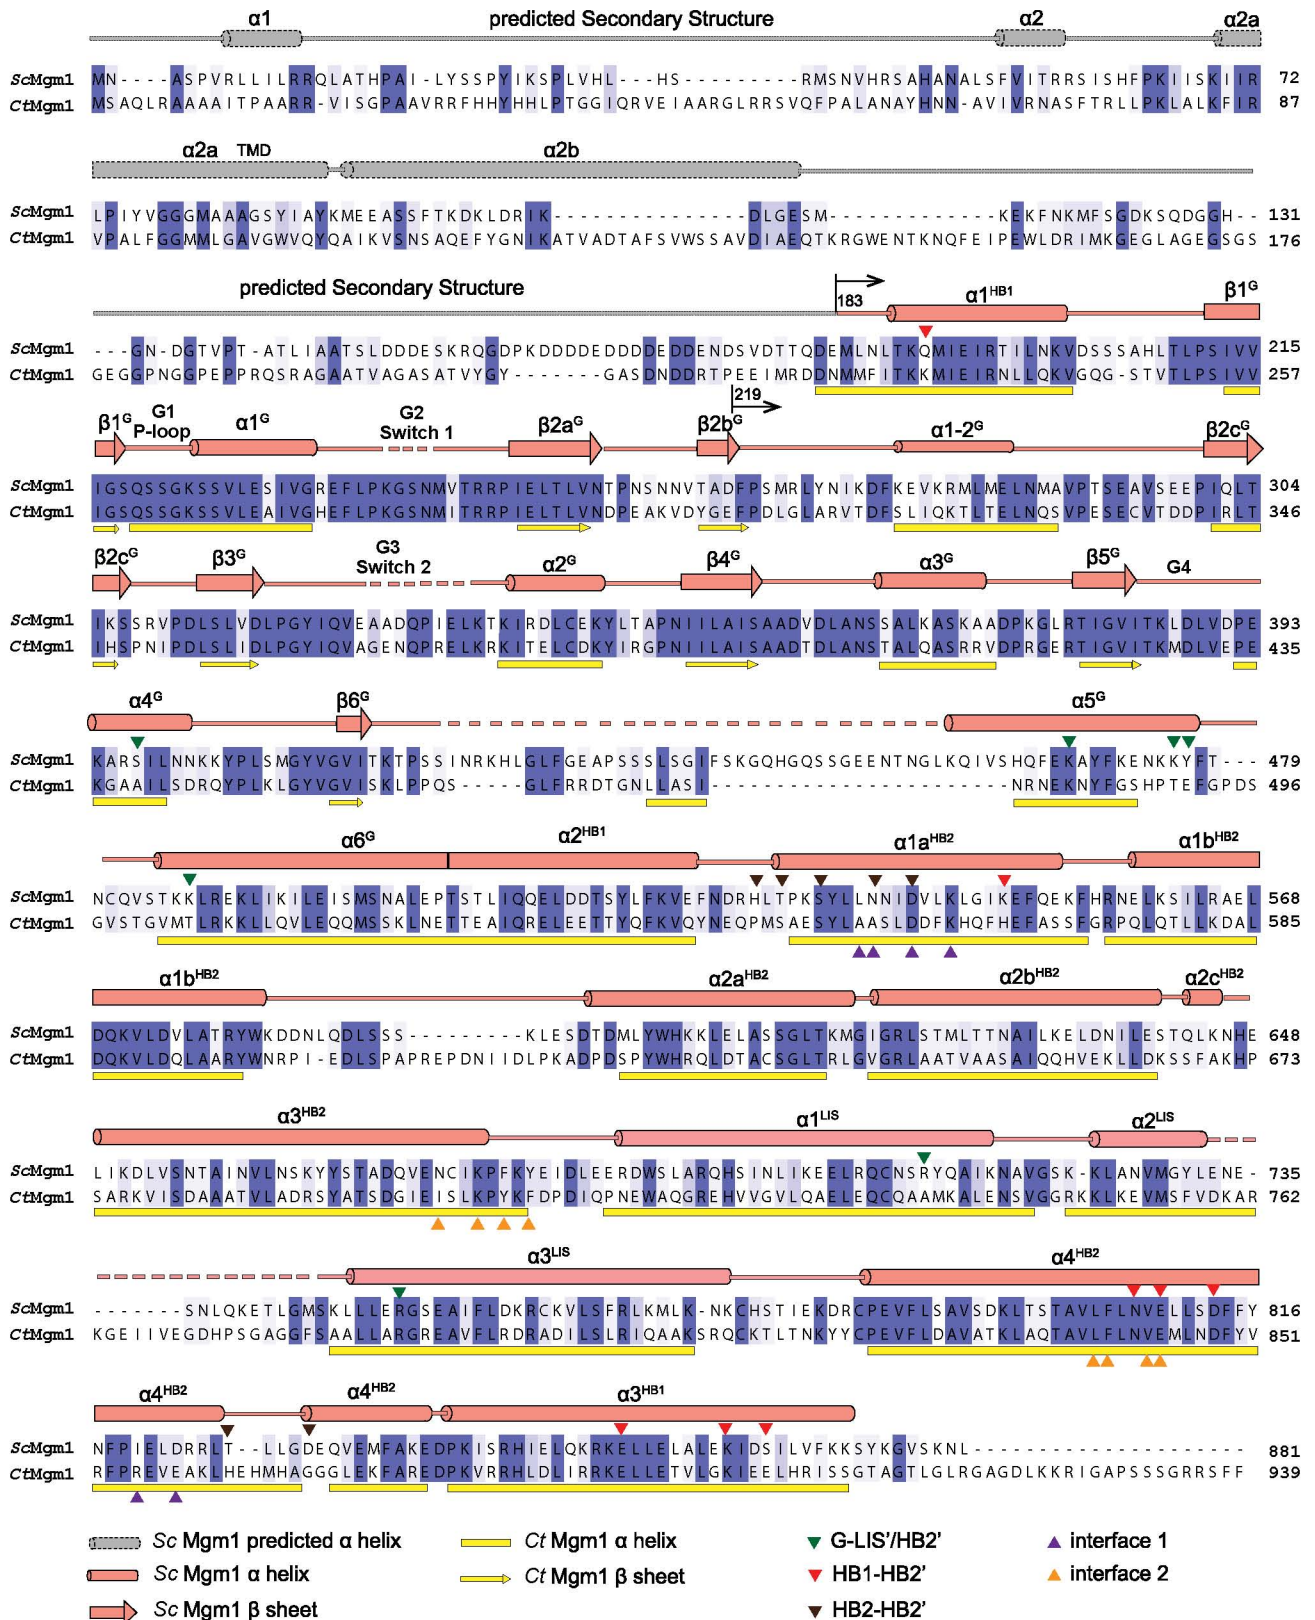

**Figure S1. Sequence alignment of Mgm1 and OPA1**

Sequences of *S. cerevisiae* (*Sc*) Mgm1 and *C. thermophilum* Mgm1 (*CtMgm1*) are numbered and aligned. The predicted and observed secondary structures of Mgm1 are labelled and coloured as indicated. Signature motifs of the G domain and residues at critical interfaces are highlighted.

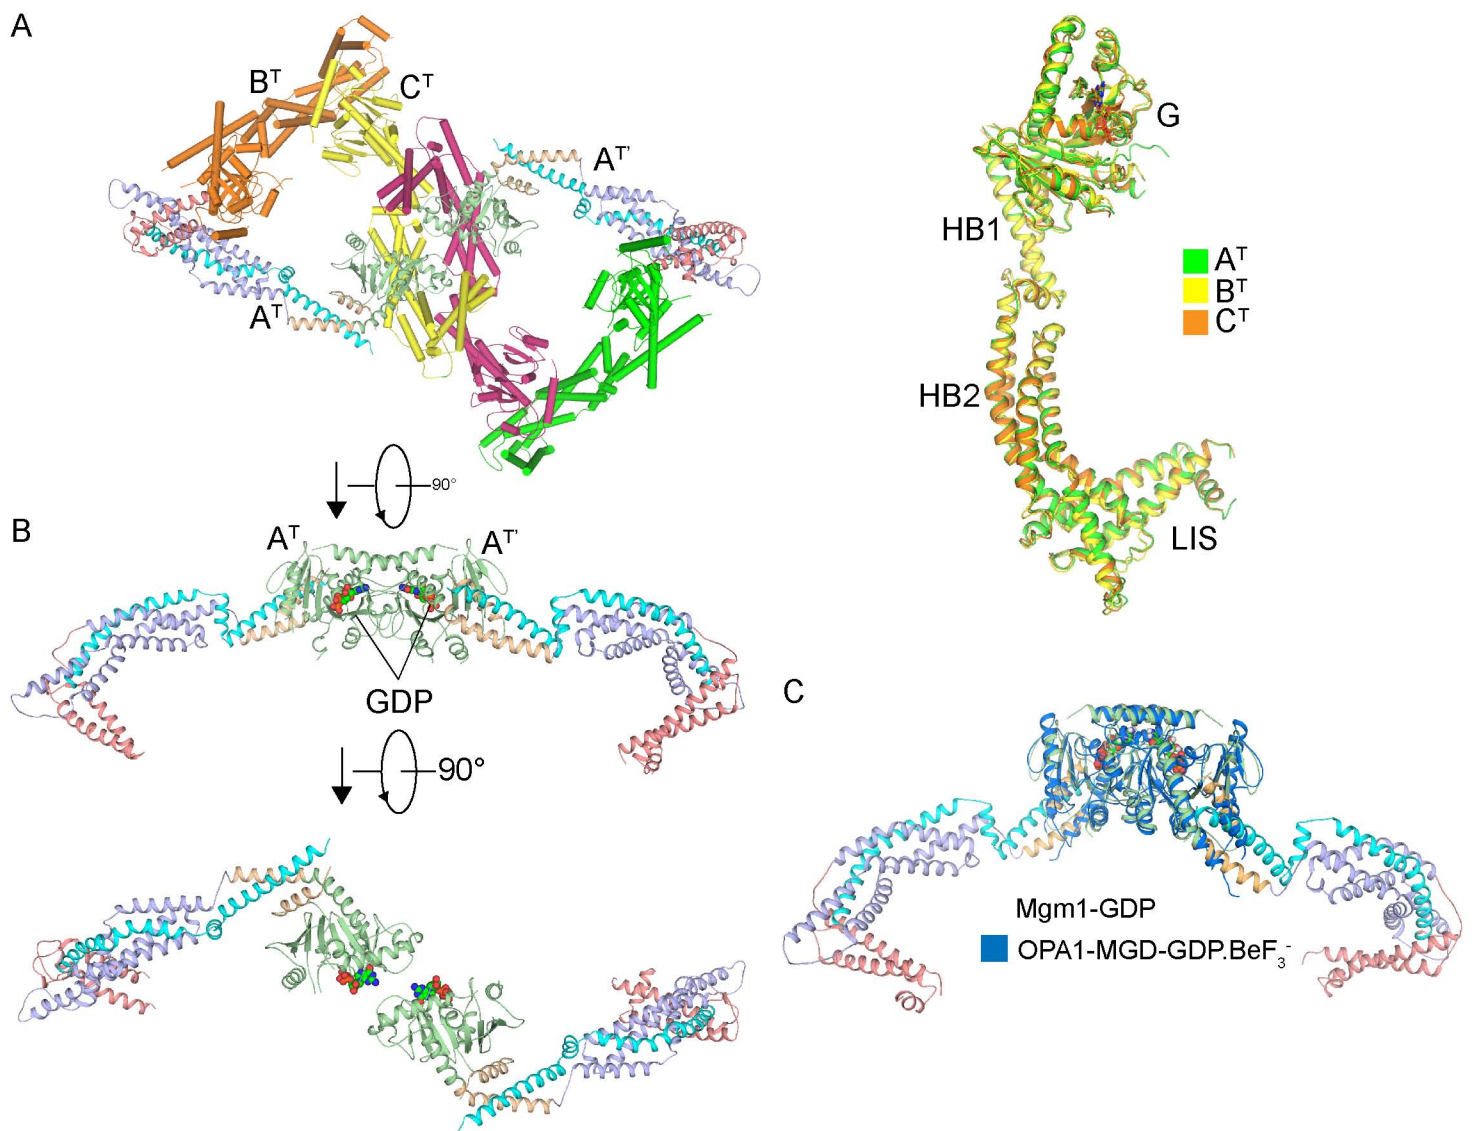

**Figure S2. Structural comparison of Mgm1 and OPA1**

(A) Two neighbouring asymmetric units are shown. The linking molecules are shown in cartoon representation. On the right, three protomers in each asymmetric unit are labelled A, B, and C and superimposed. The main domains are highlighted. (B) The two linking molecules between asymmetric units are shown individually and viewed from two angles. Notably, no substantial interactions were seen at the G-G interface. (C) Two s-Mgm1 molecules are superimposed onto the OPA1-MGD-GDP.BeF<sub>3</sub><sup>-</sup> dimer.

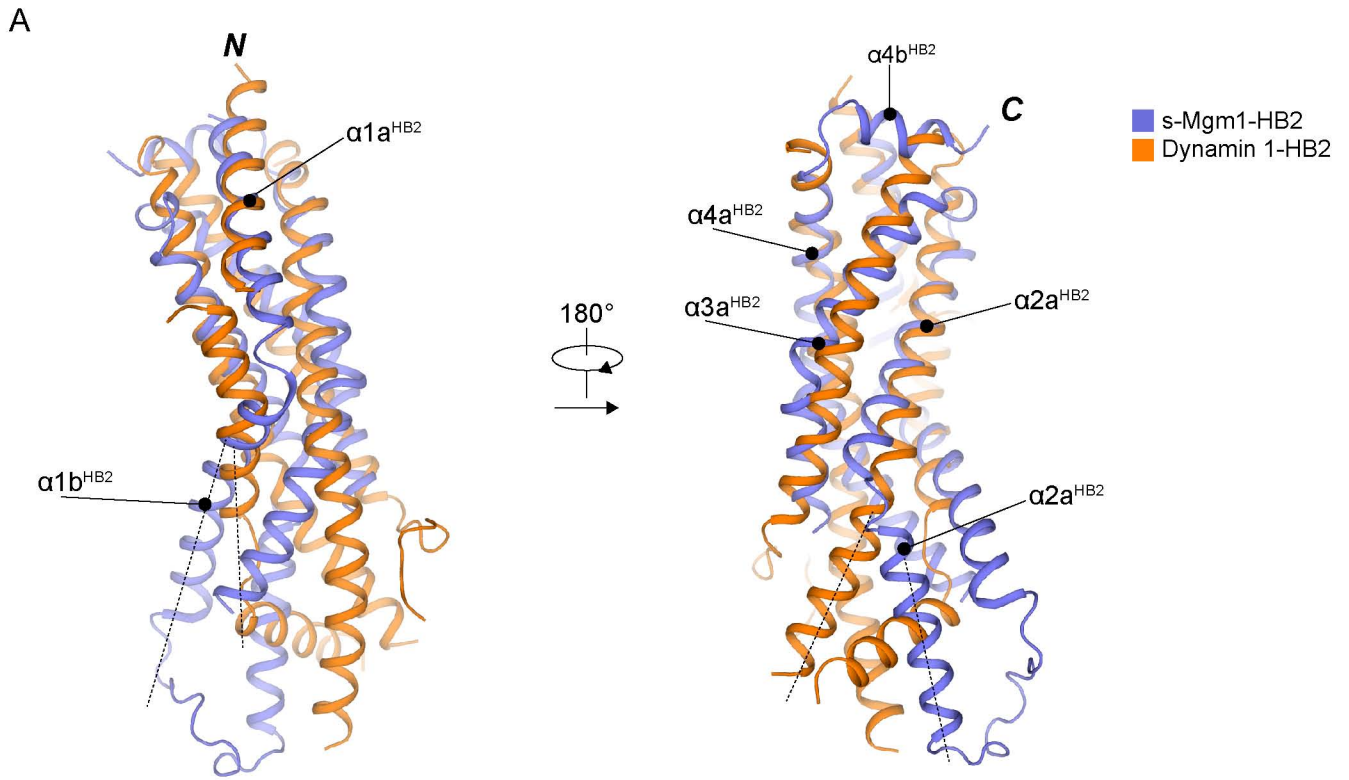

**B**

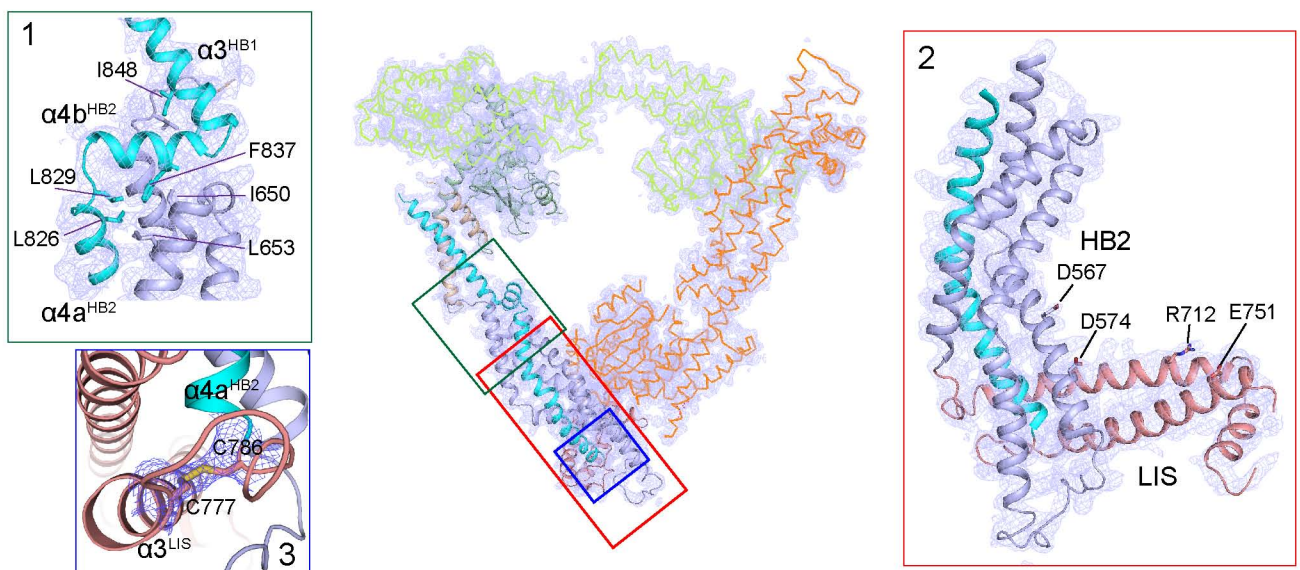

**Figure S3. Structure of the helical domains in s-Mgm1**

(A) The HB2 domain of s-Mgm1 is superimposed with the stalk domain of dynamin-1 (PDB code: 3SNH). Helices of s-Mgm1 are labelled. Deviating angles of helices in the two structures are highlighted. (B) The  $2F_o - F_c$  electron density maps ( $1.0\sigma$  contour) of the s-Mgm1 trimer are shown as wire mesh (blue). Three boxed regions are shown with zoomed-in views and key residues highlighted in a stick representation.

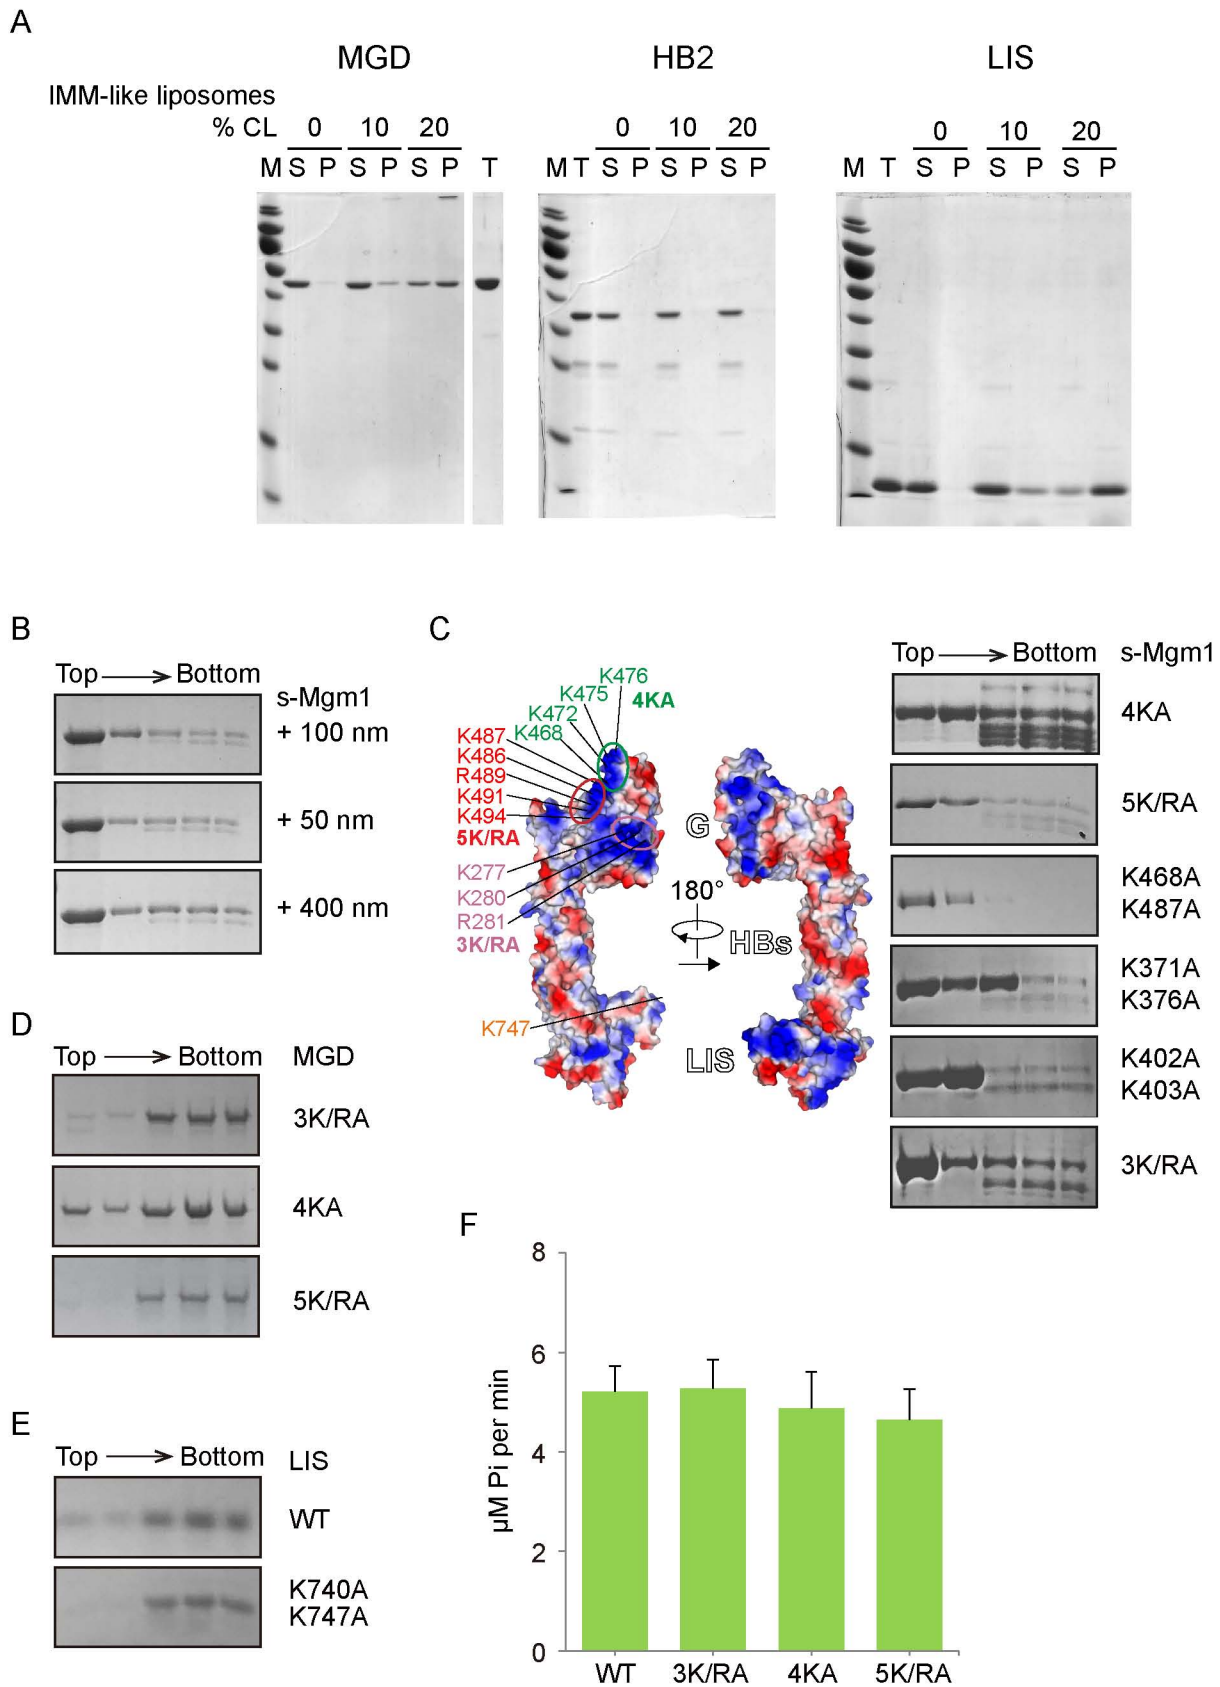

### Figure S4. Lipid interactions of s-Mgm1

(A) Different regions of s-Mgm1 were purified and subjected to the liposome pelleting assay. Inner membrane-mimicking liposomes with the indicated cardiolipin (CL) percentages were used. The data are representative of at least three repetitions. M, molecular marker; S, supernatant; P, pellet; T, total loaded protein. (B) Liposome flotation assay as in Fig. 2F, but with liposomes of various sizes. (C) Electrostatic analysis of s-Mgm1. Negatively charged surfaces are coloured in red and positively charged surfaces in blue. The positions of mutated residues are highlighted. Flotation assays of s-Mgm1 mutants are shown on the right. (D) As in B, but with purified MGD mutants. (E) As in B, but with purified LIS mutants. All flotation data are representative of at least three repetitions. (F) The GTPase activity of various Mgm1-MGD constructs was measured in the presence of 500 mM KCl and 5 mM MgCl<sub>2</sub>. A total of 5 μM of protein was used for each sample. GTP hydrolysis was measured by phosphate release at saturating GTP concentrations (0.5 mM). Data are presented as the mean ± s.d. of nine measurements from three independent experiments.

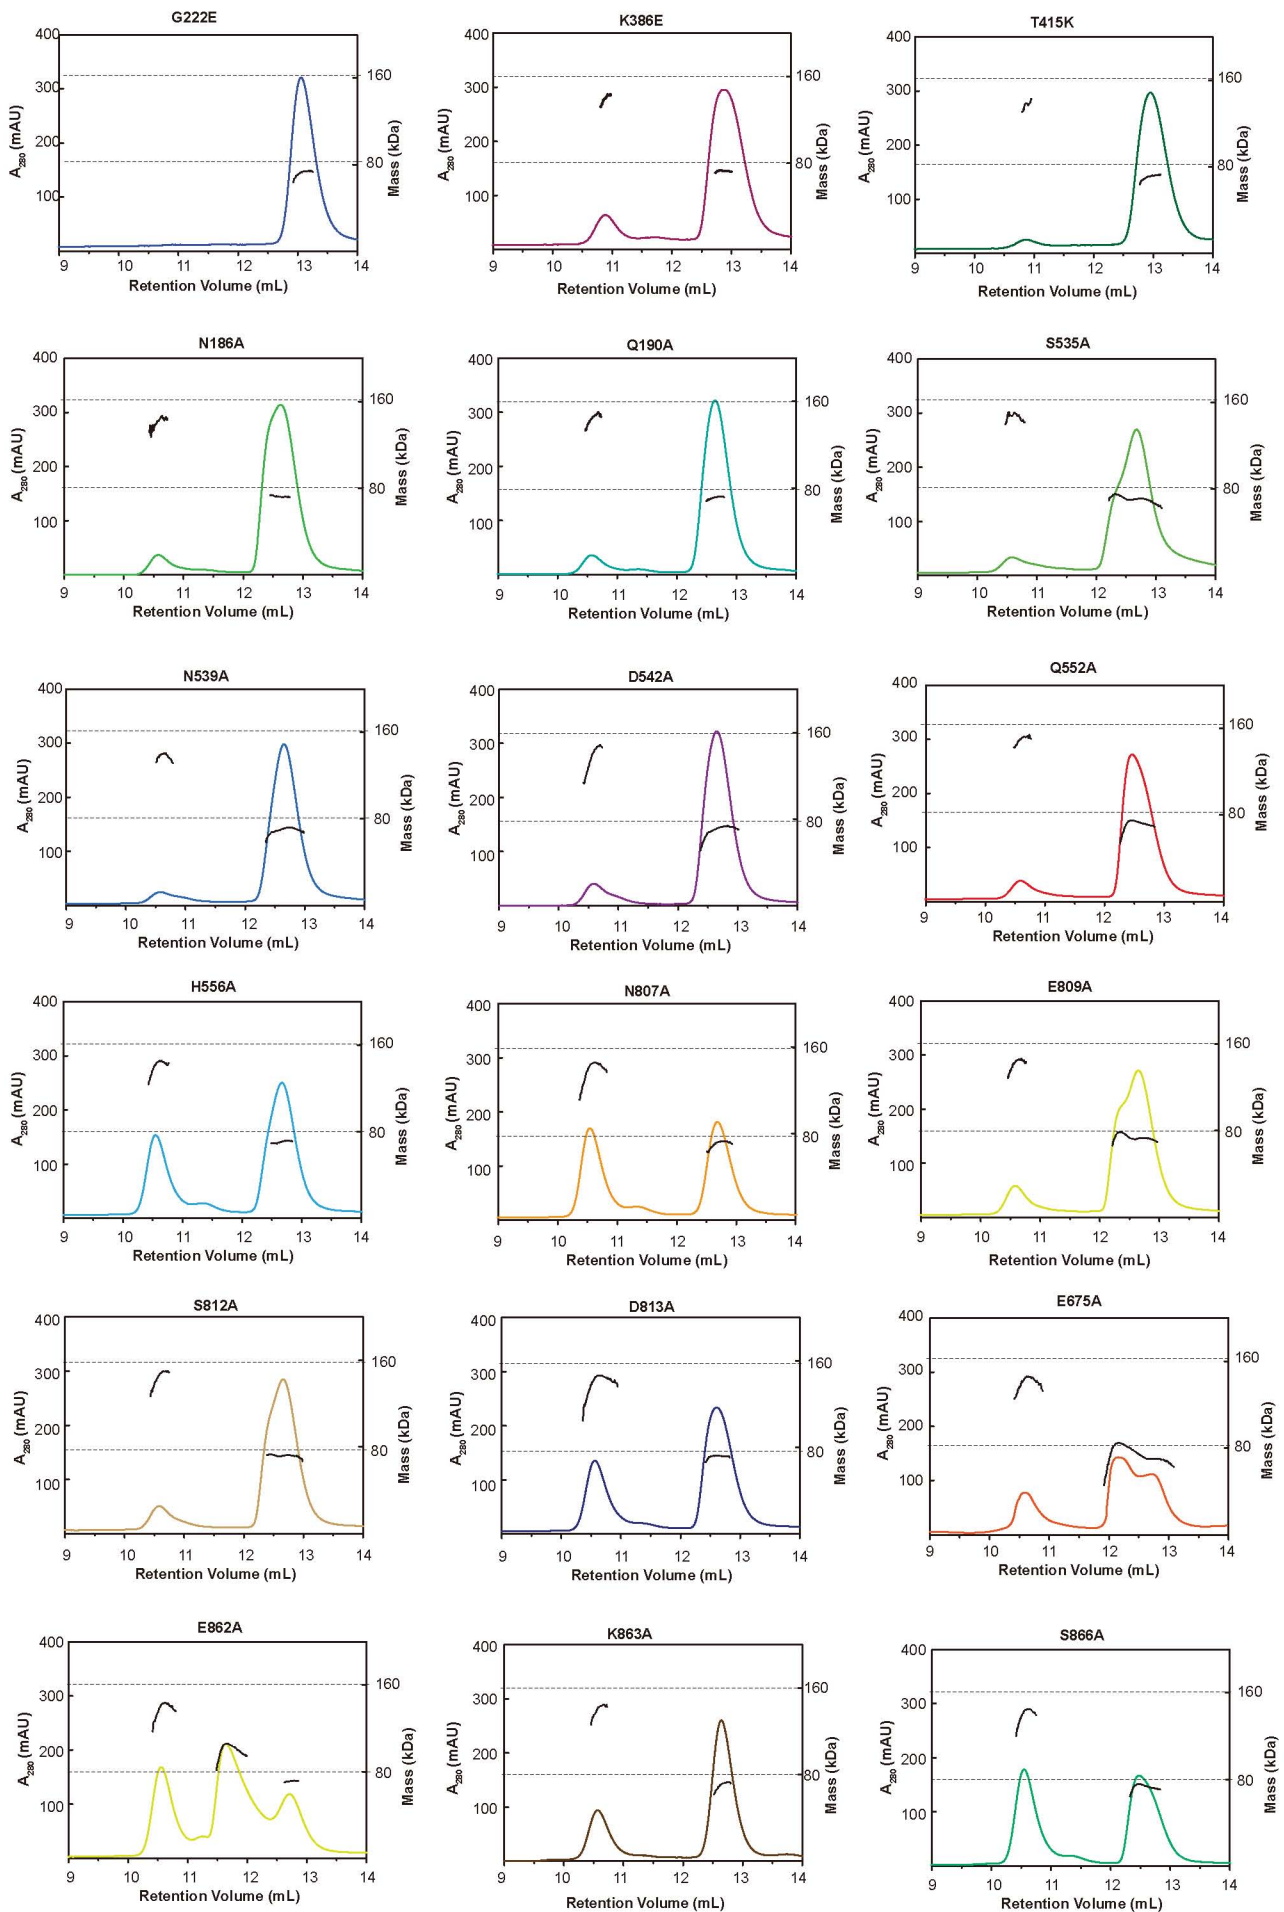

**Figure S5. Dimerization of s-Mgm1 mutants**

The size of s-Mgm1 (theoretical molecular mass 80.0 kDa) was determined by MALS coupled with gel filtration in the absence of nucleotides in a buffer containing 500 mM KCl. The estimated molecular masses are shown by the right axis. The data are representative of at least three repetitions.

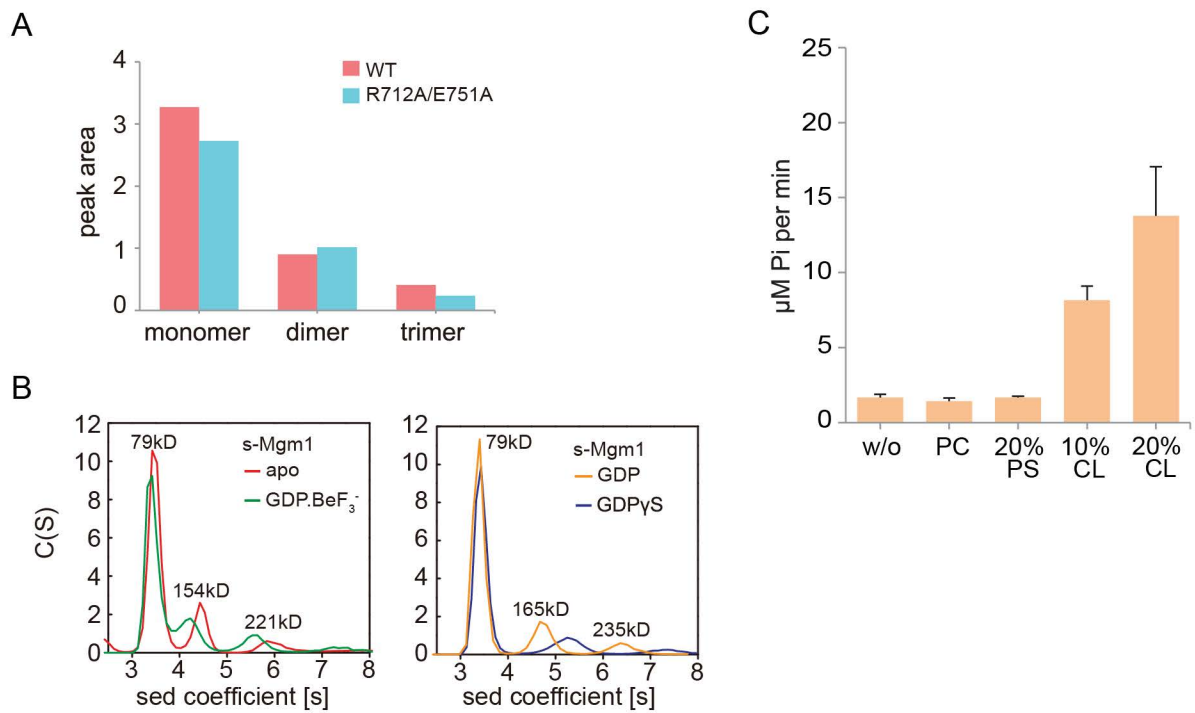

### Figure S6. Assembly of s-Mgm1

(A) The relative peak areas of results shown in Fig. 4A. (B) The size of s-Mgm1 (theoretical molecular mass 80.0 kDa) was determined at 25  $\mu$ M by analytical ultracentrifugation (AUC) in the absence or presence of 0.5 mM GDP and 2.5 mM BeF<sub>3</sub><sup>-</sup> in a buffer containing 500 mM KCl. The estimated molecular masses are given above the peaks (in kilodaltons, kDa). The data are representative of at least three repetitions. (C) The GTPase activity of s-Mgm1 constructs was measured in the absence or presence of liposomes with the indicated contents in a buffer with 100 mM KCl and 5 mM MgCl<sub>2</sub>. A total of 1  $\mu$ M of protein was used for each sample. GTP hydrolysis was measured by phosphate release at saturating GTP concentrations (0.5 mM). Data are presented as the mean  $\pm$  s.d. of nine measurements in three independent experiments.

## Fusion DLPs

Mgm1 (this study/6JSJ)

OPA1-MGD (6JTG)

MFN1-MGD (5YEW)

Sey1p (5CA8)

ATL1 (3QNU)

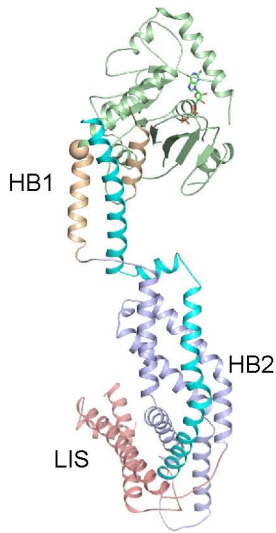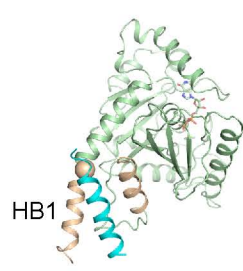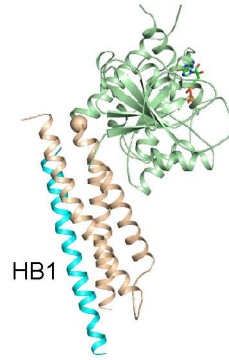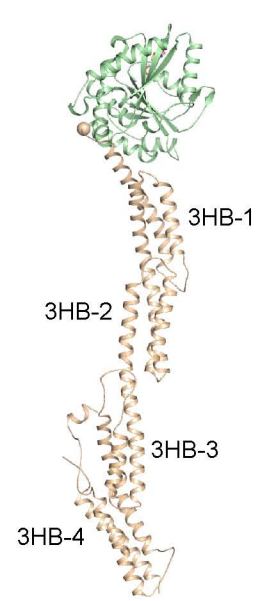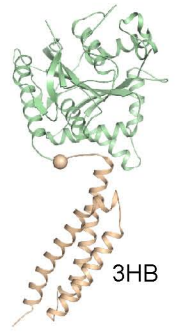

## Fission DLPs

Dynamin-1 (3SNH)

DNM1L (4BEJ)

DNM1 (6FGZ)

BDLP1 (2W6D)

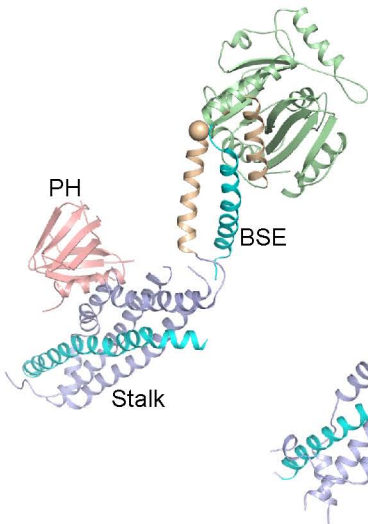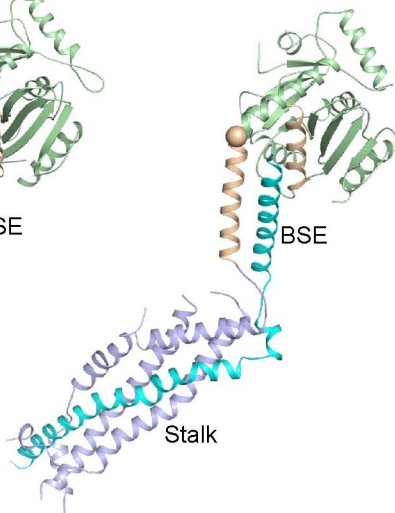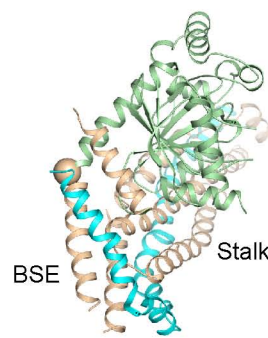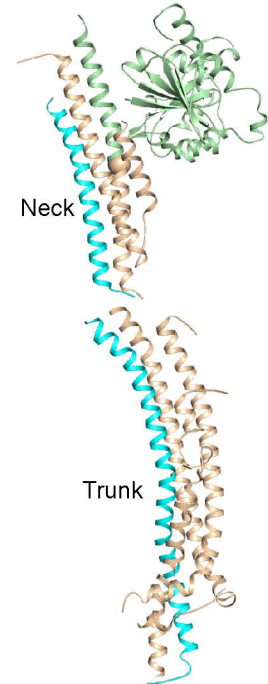

## Other DLPs

MxA (3SZR)

GBP1 (1DG3)

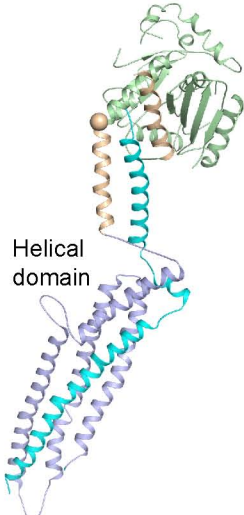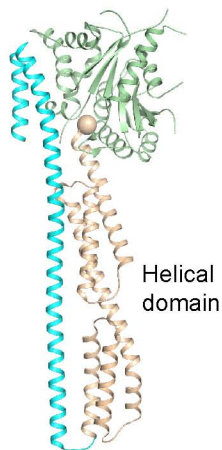

**Figure S7. Structures of DLPs categorized by their membrane remodelling activities**  
PDB codes are indicated and key domains highlighted.



**Table S1 | Data collection and refinement statistics**

| Parameters (Data collection statistics)     | Se-Met s-Mgm1                            |
|---------------------------------------------|------------------------------------------|
| <b>Data collection statistics</b>           |                                          |
| Cell parameters                             |                                          |
| a (Å)                                       | 153.5                                    |
| b (Å)                                       | 153.5                                    |
| c (Å)                                       | 236.0                                    |
| $\alpha, \beta, \gamma$ (°)                 | 90.0, 90.0, 90.0                         |
| Space group                                 | <i>P</i> 4 <sub>1</sub> 2 <sub>1</sub> 2 |
| Wavelength used (Å)                         | 0.9798                                   |
| Resolution (Å)                              | 50.0–3.2 (3.32–3.20) <sup>c</sup>        |
| No. of all reflections                      | 37,364,35 (263,590)                      |
| No. of unique reflections                   | 46,877 (3,404)                           |
| Completeness (%)                            | 99.9 (100.0)                             |
| Average I/ $\sigma$ (I)                     | 18.07 (1.29)                             |
| R <sub>merge</sub> <sup>a</sup> (%)         | 16.8 (80.3)                              |
| <b>Refinement statistics</b>                |                                          |
| No. of reflections used ( $\sigma(F) > 0$ ) | 47,088                                   |
| R <sub>work</sub> <sup>b</sup> (%)          | 22.6                                     |
| R <sub>free</sub> <sup>b</sup> (%)          | 30.7                                     |
| r.m.s.d. bond distance (Å)                  | 0.026                                    |
| r.m.s.d. bond angle (°)                     | 2.998                                    |
| Average B-value (Å <sup>2</sup> )           | 95.5                                     |
| No. of protein atoms                        | 14,704                                   |
| No. of ligand atoms                         | 93                                       |
| No. of solvent atoms                        | 0                                        |
| Ramachandran plot                           |                                          |
| res. in favored regions (%)                 | 91.66                                    |
| res. in allowed regions (%)                 | 7.39                                     |
| res. in outlier regions (%)                 | 0.95                                     |

<sup>a</sup>  $R_{merge} = \sum_h \sum_l |I_{ih} - I_h| / \sum_h \sum_l I_h$  where  $I_h$  is the mean of observations  $I_{ih}$  of reflection  $h$ .

<sup>b</sup>  $R_{work} = \Sigma (|F_p(obs)| - |F_p(calc)|) / \Sigma |F_p(obs)|$ .  $R_{free}$  is an  $R$  factor for a pre-selected subset (5%) of reflections that was excluded in the refinement.

<sup>c</sup> Numbers in parentheses are corresponding values for the highest resolution shell.

**Table S2 | Functional analysis of Mgm1 in yeast cells**

|              | Tubular Morphology      | Cells with mtDNA | Growth      |               |
|--------------|-------------------------|------------------|-------------|---------------|
| WT W303      | 95.7 ± 1.5              | 94.5 ± 2.0       | +           |               |
| <i>Δmgm1</i> | 0.0 ± 0.0               | 0.0 ± 0.0        | -           |               |
| <i>Δmgm1</i> | pRS425                  | 0.2 ± 0.2        | -           |               |
|              | WT                      | 83.2 ± 5.6       | 70.6 ± 9.7  | +             |
|              | Δ149-173                | 83.2 ± 6.9       | 36.6 ± 7.2  | partial +/-   |
|              | Δ161-173                | 29.7 ± 5.6       | 15.2 ± 3.0  | partial +/- - |
|              | Δ161-198                | 0.4 ± 0.4        | 1.4 ± 0.8   | -             |
|              | Q190A                   | 22.7 ± 7.7       | 25.2 ± 1.5  | partial +/-   |
|              | Q190A E809A             | 14.9 ± 3.7       | 8.6 ± 9.0   | -             |
|              | R195E                   | 0.4 ± 0.4        | 2.6 ± 2.3   | -             |
|              | Q219R                   | 3.0 ± 0.8        | 3.3 ± 3.3   | -             |
|              | S220A                   | 0.6 ± 0.6        | 0.0 ± 0.0   | -             |
|              | KGS238DDA               | 0.5 ± 0.5        | 0.0 ± 0.0   | -             |
|              | K238D                   | 2.4 ± 1.6        | 0.0 ± 0.0   | -             |
|              | G239D                   | 71.2 ± 9.3       | 63.7 ± 15.1 | partial +/-   |
|              | S240A                   | 79 ± 5.4         | 78.6 ± 1.9  | +             |
|              | V324D                   | 79 ± 4.7         | 5.5 ± 1.0   | partial +/-   |
|              | D360A                   | 15.6 ± .41       | 12.0 ± 2.7  | partial +/-   |
|              | L367D                   | 16.5 ± 3.4       | 10.8 ± 2.7  | partial +/-   |
|              | S397A                   | 68.2 ± 3.1       | 43.7 ± 4.4  | +             |
|              | S397A E751A             | 30.5 ± 9.0       | 0.0 ± 0.0   | -             |
|              | Δ421-454                | 19.7 ± 5.2       | 65.2 ± 5.4  | partial +/-   |
|              | R423D                   | 83.8 ± 2.0       | 75.9 ± 3.0  | partial +/-   |
|              | K424A                   | 85.4 ± 2.8       | 76.6 ± 0.8  | +             |
|              | K468A K487A             | 20.8 ± 9.2       | 0.0 ± 0.0   | -             |
|              | K468E K487D             | 35.0 ± 0.9       | 3.3 ± 3.3   | -             |
|              | K468A K487A E567A D574A | 6.1 ± 2.6        | 4.3 ± 4.3   | -             |
|              | K468E K487D E567K D574K | 16.6 ± 9.3       | 10.6 ± 6.0  | -             |
|              | Y477A                   | 42.2 ± 8.7       | 48.4 ± 2.6  | +             |
|              | Y477A R712A             | 28.9 ± 3.5       | 0.0 ± 0.0   | -             |
|              | D528K                   | 1.0 ± 0.6        | 1.3 ± 0.8   | -             |
|              | N539D K863D             | 4.8 ± 2.8        | 0.3 ± 0.2   | -             |
|              | I541D                   | 0.0 ± 0.0        | 2.9 ± 2.9   | -             |
|              | D542K                   | 0.5 ± 0.5        | 0.0 ± 0.0   | -             |
|              | G547D                   | 62.0 ± 5.9       | 55.8 ± 4.3  | +             |
|              | K549A                   | 19.3 ± 2.8       | 5.6 ± 4.9   | -             |
|              | K549A E855A             | 62.0 ± 4.6       | 32.5 ± 4.8  | +             |
|              | F555A                   | 79.5 ± 2.5       | 73.3 ± 2.8  | +             |
|              | L560A                   | 76.1 ± 3.7       | 79.0 ± 4.0  | +             |
|              | Δ561-588                | 0.0 ± 0.0        | 0.0 ± 0.0   | -             |
|              | K561D                   | 81.2 ± 1.2       | 76.1 ± 5.4  | +             |
|              | R565D                   | 79.9 ± 4.6       | 75.5 ± 4.7  | +             |
|              | E567A D574A             | 17.5 ± 9.1       | 0.0 ± 0.0   | -             |
|              | E567K D574K             | 42.6 ± 0.5       | 28.7 ± 4.2  | partial +/-   |
| K571D        | 77.2 ± 6.5              | 76.5 ± 1.5       | +           |               |
| D574K        | 76.2 ± 3.9              | 69.4 ± 3.5       | partial +/- |               |
| T578D        | 77.0 ± 7.6              | 37.3 ± 7.4       | +           |               |
| R579K        | 80.9 ± 6.2              | 76.2 ± 7.4       | partial +/- |               |
| Y580D        | 32.0 ± 8.3              | 19.4 ± 3.0       | +           |               |
| W581A        | 80.6 ± 2.0              | 70.2 ± 13.5      | partial +/- |               |
| SSS590-92AAA | 71.8 ± 3.9              | 74.3 ± 1.3       | +           |               |
| D597K        | 54.5 ± 7.3              | 55.0 ± 7.9       | +           |               |

|             |             |             |             |
|-------------|-------------|-------------|-------------|
| Y602A       | 87.3 ± 2.2  | 79.4 ± 3.4  | +           |
| W603A       | 69.4 ± 3.9  | 56.0 ± 11.8 | +           |
| GIGR618AAAA | 0.5 ± 0.5   | 0.0 ± 0.0   | -           |
| L635S       | 77.9 ± 4.8  | 34.0 ± 1.5  | +           |
| E640K       | 79.6 ± 2.9  | 47.6 ± 7.6  | +           |
| D652K       | 77.2 ± 3.3  | 47.8 ± 6.1  | +           |
| L653D       | 48.9 ± 5.8  | 39.9 ± 1.4  | +           |
| K665E       | 72.7 ± 5.3  | 54.1 ± 4.8  | +           |
| D671G       | 92.4 ± 2.7  | 61.1 ± 2.3  | -           |
| D671A       | 73.1 ± 1.1  | 55.4 ± 10.2 | -           |
| D671K       | 19.6 ± 5.3  | 9.9 ± 5.9   | -           |
| E674G       | 10.3 ± 2.7  | 8.9 ± 0.7   | partial +/- |
| E674K       | 1.3 ± 1.0   | 0.9 ± 0.5   | -           |
| K678A       | 61.8 ± 3.8  | 38.7 ± 1.9  | partial +/- |
| K678E       | 3.7 ± 1.2   | 0.0 ± 0.0   | -           |
| P679A       | 74.3 ± 4.7  | 50.2 ± 4.4  | +           |
| Y682A       | 72.9 ± 4.8  | 69.9 ± 5.7  | +           |
| D685K       | 67.1 ± 4.5  | 77.9 ± 4.7  | partial +/- |
| D690K       | 83.3 ± 6.4  | 73.0 ± 2.8  | +           |
| W691A       | 75.1 ± 2.1  | 77.5 ± 7.7  | +           |
| R695Q       | 79.6 ± 3.2  | 54.0 ± 4.0  | +           |
| C709S       | 85.4 ± 1.2  | 46.0 ± 7.8  | +           |
| N710L       | 83.9 ± 3.6  | 44.4 ± 1.2  | +           |
| R712A       | 25.5 ± 13.4 | 0.2 ± 0.2   | -           |
| V720A       | 81.2 ± 10.0 | 83.8 ± 4.6  | +           |
| E751A       | 36.2 ± 1.3  | 45.9 ± 5.1  | +           |
| VL765AA     | 78.6 ± 1.3  | 83.6 ± 3.6  | +           |
| K774A       | 76.2 ± 5.0  | 50.9 ± 2.1  | +           |
| C777A       | 78.4 ± 3.7  | 78.1 ± 3.0  | +           |
| K783E       | 89.1 ± 3.4  | 79.9 ± 3.2  | +           |
| L791A       | 78.7 ± 3.2  | 75.0 ± 3.4  | +           |
| VL803AA     | 81.5 ± 0.9  | 75.2 ± 4.9  | +           |
| E809A       | 9.7 ± 3.1   | 3.4 ± 4.1   | -           |
| F814D       | 1.4 ± 1.4   | 0.0 ± 0.0   | -           |
| Y816A       | 1.9 ± 1.1   | 0.0 ± 0.0   | -           |
| I820A       | 48.5 ± 3.8  | 42.4 ± 9.7  | partial +/- |
| E821K       | 78.7 ± 7.2  | 76.1 ± 4.6  | +           |
| L826D       | 0.9 ± 0.9   | 0.3 ± 0.3   | -           |
| L829D       | 5.4 ± 2.9   | 2.3 ± 1.6   | -           |
| Δ849-868    | 3.4 ± 2.2   | 0.0 ± 0.0   | -           |
| R853A       | 0.0 ± 0.0   | 1.2 ± 1.2   | partial +/- |
| E855A       | 17.5 ± 1.2  | 4.0 ± 4.9   | -           |
